# Supplementary material
Source: publisher site journal article supplement (https://www.dovepress.com/article/407338)
Supplement: Supplementary file 1 [file get_supplementary_file.php]

**SUPPLEMENTAL MATERIAL**

Catalogue

Table S1. The specific formulas of prediction equations .....3

Table S2. Baseline characteristics of the patients included and excluded .....4

eReferences .....5

**Table S1. The specific formulas of prediction equations**

| Prediction equation                       |                                                                                                                                                                                                                                                                                                                                                                                                                                                                                                                                                                                                                                                                                                                                                                                          |
|-------------------------------------------|------------------------------------------------------------------------------------------------------------------------------------------------------------------------------------------------------------------------------------------------------------------------------------------------------------------------------------------------------------------------------------------------------------------------------------------------------------------------------------------------------------------------------------------------------------------------------------------------------------------------------------------------------------------------------------------------------------------------------------------------------------------------------------------|
| <b>The Nelson equation<sup>1</sup></b>    |                                                                                                                                                                                                                                                                                                                                                                                                                                                                                                                                                                                                                                                                                                                                                                                          |
| <b>With diabetes</b>                      | $1 - \exp(-5^{0.9766551} \times \exp[-2.647004 + 0.1351572 \times (\text{age}/5 - 11) + 0.1381975 \times (\text{if female}) + 0.0920208 \times (\text{if black}) + 0.3546697 \times (15 - \min(\text{eGFR}, 90)/5) - 0.1525133 \times \max(0, \text{eGFR} - 90)/5 + 0.1870637 \times (\text{if has history of CVD}^*) + 0.0619679 \times (\text{HbA1c} - 7) + 0.1078296 \times (\text{if insulin use}) - 0.150944 \times (\text{if no DM medication use}) + 0.023959 \times (\text{HbA1c} - 7) \times (\text{if insulin use}) + 0.0398424 \times (\text{HbA1c} - 7) \times (\text{if no DM medication use}) - 0.00084 \times (\text{if ever smoking}) + 0.3653268 \times (\text{if hypertensive}) + 0.050306 \times (\text{BMI}/5 - 5.4) + 0.3737905 \times (\log_{10}\text{ACR} - 1)])$ |
| <b>Without diabetes</b>                   | $1 - \exp(-5^{1.055408} \times \exp[-3.609661 + 0.2582196 \times (\text{age}/5 - 11) + 0.1821665 \times (\text{if female}) + 0.1808945 \times (\text{if black}) + 0.4581006 \times (15 - \min(\text{eGFR}, 90)/5) - 0.3159218 \times \max(0, \text{eGFR} - 90)/5 + 0.1953927 \times (\text{if has history of CVD}^*) + 0.1213741 \times (\text{if ever smoking}) + 0.3543645 \times (\text{if hypertensive}) + 0.0630538 \times (\text{BMI}/5 - 5.4) + 0.3519087 \times (\log_{10}\text{ACR} - \text{expected } \log_{10}\text{ACR})])$                                                                                                                                                                                                                                                  |
| <b>The O'Seaghda equation<sup>2</sup></b> | $1 - (1 - 0.092)^{0.5} / ((1 - 0.092)^{0.5} + (1 - (1 - 0.092)^{0.5}) \times \exp(-6.235 + 0.095 \times \text{age} + 0.476 \times (\text{if diabetics}) + 0.761 \times (\text{if hypertensive}) + 0.779 \times (\text{if } 75 \leq \text{eGFR} < 90) + 1.558 \times (\text{if } 60 \leq \text{eGFR} < 75) + 0.300 \times (\text{if ACR} \geq 30 \text{ or dipstick} \geq \text{trace})))$                                                                                                                                                                                                                                                                                                                                                                                                |
| <b>The Chien equation<sup>3</sup></b>     | $1 - 0.9632 \times \exp(-6.8 + 0.077 \times \text{age} + 0.366 \times (\text{if diabetics}) + 1.24 \times (\text{if history of stroke}) + 0.059 \times \text{BMI} + 0.018 \times \text{SBP})$                                                                                                                                                                                                                                                                                                                                                                                                                                                                                                                                                                                            |

Abbreviations: ACR, urine albumin-creatinine ratio; BMI, body mass index; CVD, cardiovascular disease; DM, diabetes mellitus; eGFR, estimated glomerular filtration rate; HbA1c, hemoglobin A1c; SBP, systolic blood pressure.

\* CVD included ischemic stroke, ICH, TIA, coronary heart disease, and heart failure

**Table S2. Baseline characteristics of the patients included and excluded**

| <b>Characteristic</b>                                | <b>Included<br/>(n=3169)</b> | <b>Excluded<br/>(n=11997)</b> | <b>p-value</b> |
|------------------------------------------------------|------------------------------|-------------------------------|----------------|
| <b>Age, mean±SD, y</b>                               | 61.7±11.0                    | 62.4±11.4                     | 0.0006         |
| <b>Women, n (%)</b>                                  | 989(31.2)                    | 3813(31.8)                    | 0.54           |
| <b>BMI, mean±SD, kg/m<sup>2</sup></b>                | 24.8±3.4                     | 24.7±3.3                      | 0.04           |
| <b>SBP, mean±SD, mmHg</b>                            | 151.1±21.6                   | 149.8±22.2                    | 0.0008         |
| <b>Medical history, n(%)</b>                         |                              |                               |                |
| <b>ischemic stroke</b>                               | 663(20.9)                    | 2486(20.7)                    | 0.81           |
| <b>ICH</b>                                           | 64(2.0)                      | 198(1.7)                      | 0.16           |
| <b>TIA</b>                                           | 93(2.9)                      | 323(2.7)                      | 0.46           |
| <b>Coronary heart disease</b>                        | 341(10.8)                    | 1267(10.6)                    | 0.75           |
| <b>Congestive heart failure</b>                      | 80(0.7)                      | 14(0.4)                       | 0.15           |
| <b>Known atrial fibrillation or flutter</b>          | 163(5.1)                     | 856(7.1)                      | <0.0001        |
| <b>Hypertension</b>                                  | 1973(62.3)                   | 7521(62.7)                    | 0.66           |
| <b>Diabetes mellitus</b>                             | 824(26.0)                    | 2733(22.8)                    | 0.0001         |
| <b>Hypercholesterolemia</b>                          | 252(8.0)                     | 939(7.8)                      | 0.82           |
| <b>Ever smoking, n (%)</b>                           | 1589(50.1)                   | 5731(47.8)                    | 0.02           |
| <b>Index event, n(%)</b>                             |                              |                               |                |
| <b>Stroke</b>                                        | 2878(90.8)                   | 11104(92.6)                   | 0.001          |
| <b>TIA</b>                                           | 291(9.2)                     | 893(7.4)                      |                |
| <b>NIHSS score on admission, mean±SD</b>             | 3.9±3.6                      | 4.3±4.3                       | 0.005          |
| <b>Laboratory tests</b>                              |                              |                               |                |
| <b>eGFR, median (IQR), mL/min/1.73 m<sup>2</sup></b> | 103.9(93.4-112.8)            | 101.0(92.5-109.5)             | <0.0001        |
| <b>HbA1c, median (IQR), %</b>                        | 5.9(5.4-6.9)                 | 5.9(5.5-7.0)                  | <0.0001        |
| <b>ACR, median (IQR), mg/mmol</b>                    | 0.7(0.3-2.7)                 | 0.8(0.2-3.4)                  | 0.02           |

Abbreviations: ACR, urine albumin-creatinine ratio; BMI, body mass index; eGFR, estimated glomerular filtration rate; HbA1c, hemoglobin A1c; ICH, intracranial hemorrhage; IQR, interquartile ranges; NIHSS, National Institute; SBP, systolic blood pressure; SD, standard deviation; TIA, transient ischaemic attack.

**eReferences**

1. Nelson RG, Grams ME, Ballew SH, et al. Development of Risk Prediction Equations for Incident Chronic Kidney Disease. *Jama* 2019;322:2104-2114.
2. O'Seaghdha CM, Lyass A, Massaro JM, et al. A risk score for chronic kidney disease in the general population. *Am J Med* 2012;125:270-277.
3. Chien KL, Lin HJ, Lee BC, et al. A prediction model for the risk of incident chronic kidney disease. *Am J Med* 2010;123:836-846.e832.
